# Supplementary material for: Conformational disorder enabled emission phenomena in heavily doped TADF films
Source: Royal Society of Chemistry journal article supplement (doi:10.1039/d1cp04905d), 2021-11-23
Supplement: d1cp04905d1.pdf [file d1cp04905d1.pdf]

## Electronic Supporting Information

# **Conformational disorder enabled emission phenomena in heavily doped TADF films**

Tomas Serevičius<sup>a\*</sup>, Rokas Skaisgiris<sup>a</sup>, Dalius Gudeika<sup>b</sup>, Karolis Kazlauskas<sup>a</sup>, Saulius Juršėnas<sup>a</sup>

<sup>a</sup>Institute of Photonics and Nanotechnology, Vilnius University, Sauletekio 3, LT-10257 Vilnius, Lithuania.

<sup>b</sup>Department of Polymer Chemistry and Technology, Kaunas University of Technology, Radvilenu 19, LT-50254 Kaunas, Lithuania

\*tomas.serevicius@tmi.vu.lt

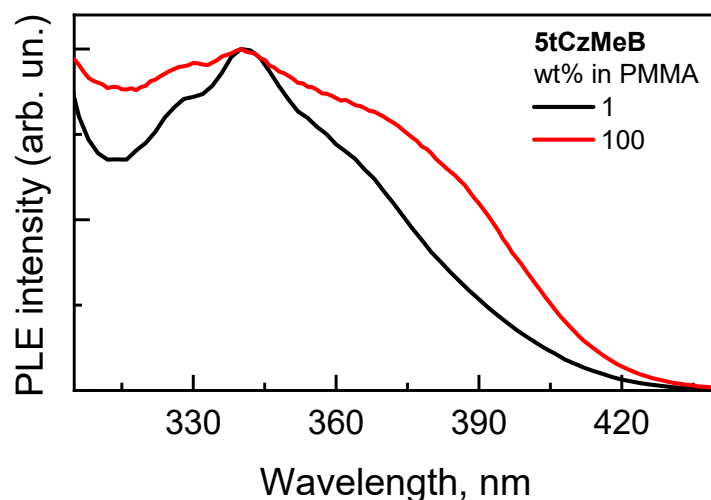

**Fig.S1** Photoluminescence excitation spectra of **5tCzMeB** in 1 wt% and 100 wt% PMMA films. Excitation wavelength range was 300-450 nm, emission intensity was collected at 490 nm.

**Table S1** On-set energy values of fluorescence and phosphorescence spectra as well as singlet-triplet energy gaps for **5tCzMeB** at different doping concentration in PMMA at 10 K. <sup>3</sup>LE energy value was taken from ref.<sup>1</sup>

| Concentration | $S_1$ ( <sup>1</sup> CT)(eV) | $T_1$ ( <sup>3</sup> LE) (eV) | $T_1$ ( <sup>3</sup> CT) (eV) | $\Delta E_{ST}$ ( <sup>1</sup> CT - <sup>3</sup> CT) (meV) |
|---------------|------------------------------|-------------------------------|-------------------------------|------------------------------------------------------------|
| 1 wt%         | 2.93                         | 2.99                          | 2.88                          | 50                                                         |
| 5 wt%         | 2.94                         | 2.99                          | 2.87                          | 70                                                         |
| 10 wt%        | 2.94                         | 2.99                          | 2.85                          | 90                                                         |
| 20 wt%        | 2.95                         | 2.99                          | 2.85                          | 100                                                        |
| 50 wt%        | 2.96                         | 2.99                          | 2.84                          | 120                                                        |
| 100 wt%       | 2.96                         | 2.99                          | 2.82                          | 140                                                        |

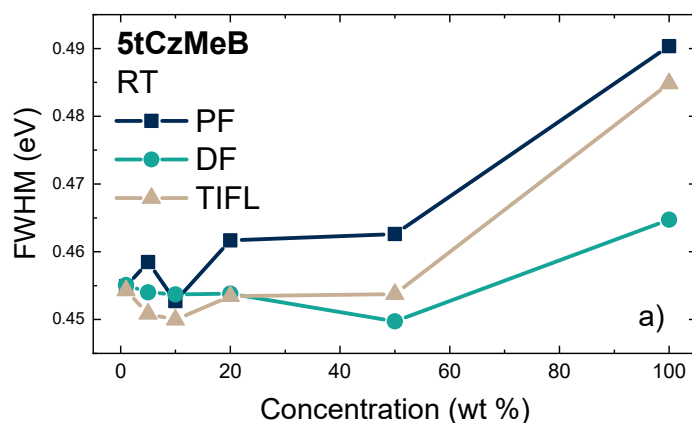

**Fig. S2** FWHM values of PF, DF and TIFL spectra of **5tCzMeB** in PMMA at different doping concentration at room temperature.

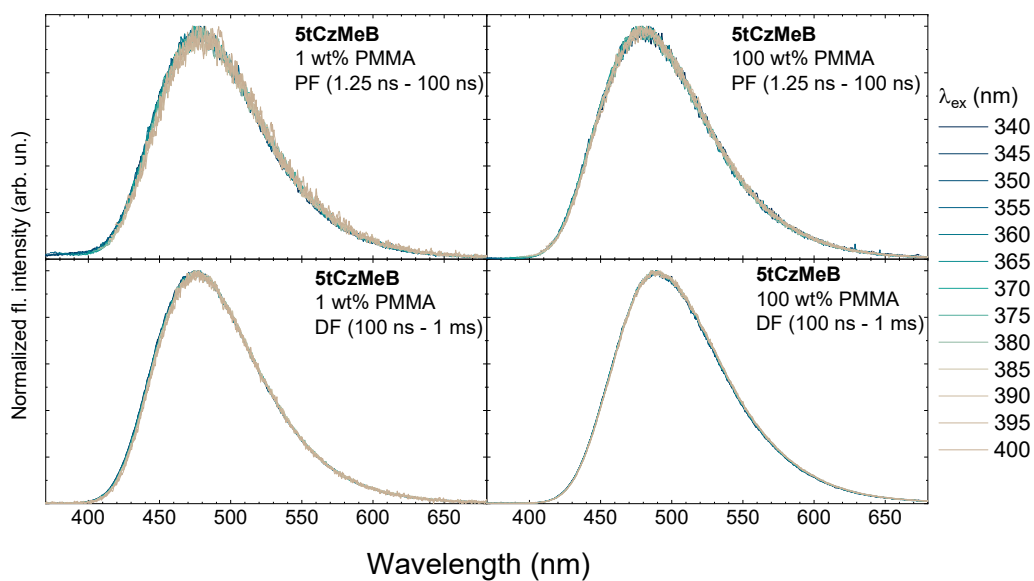

**Fig. S3** Normalized fluorescence spectra of 1 wt% and 100 wt% PMMA films of **5tCzMeB** at different excitation wavelength ( $\lambda_{ex}$ ).

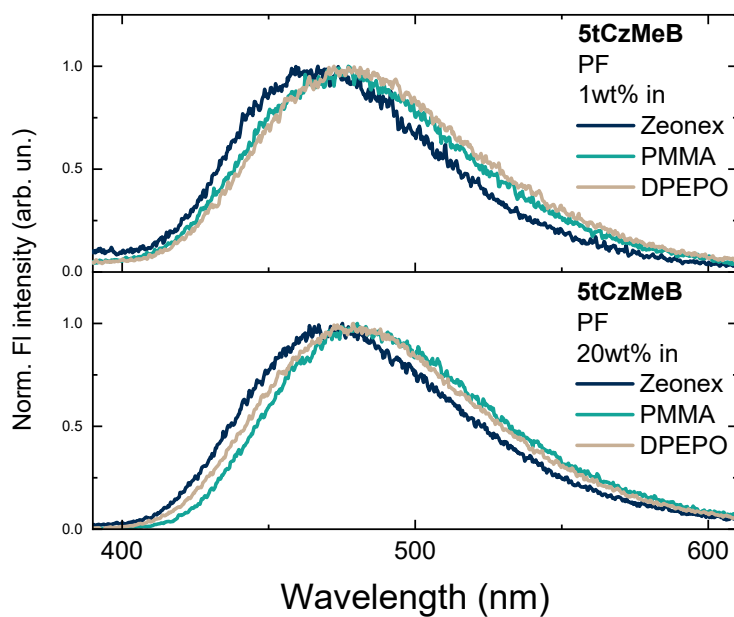

**Fig. S4** PF spectra of 1wt% (a) and 20 wt% (b) films of **5tCzMeB** in Zeonex, PMMA and DPEPO films at room temperature.

**Table S2** Fluorescence quantum yields and decay rates of **5tCzMeB** at different doping concentration in PMMA. Its noteworthy that solution-processed **5tCzMeB** films showed lower fluorescence quantum yields than vacuum-processed analogous films in ref.<sup>2</sup>

| wt % | $\Phi_{FL}^a$ | $\Phi_{PF}^b$ | $\Phi_{DF}^c$ | $k_{FL}$<br>( $\times 10^8$ ) <sup>d</sup> | $k_R$<br>( $\times 10^6$ ) <sup>e</sup> | $\tau_{DF}^f$<br>( $\mu s$ ) | $k_{ISC}$<br>( $\times 10^8$ ) <sup>g</sup> | $k_{rISC}$<br>( $\times 10^6$ ) <sup>h</sup> | $k_{nr}^T$<br>( $\times 10^4$ ) <sup>i</sup> | $k_{CQ}^T$<br>( $\times 10^4$ ) <sup>j</sup> |
|------|---------------|---------------|---------------|--------------------------------------------|-----------------------------------------|------------------------------|---------------------------------------------|----------------------------------------------|----------------------------------------------|----------------------------------------------|
| 1    | 0.50          | 0.018         | 0.48          | 2.7                                        | 5.0                                     | 14.3                         | 2.7                                         | 1.9                                          | 3.6                                          | -                                            |
| 5    | 0.55          | 0.018         | 0.53          | 2.8                                        | 5.0                                     | 13.2                         | 2.8                                         | 2.3                                          | 3.5                                          | -                                            |
| 10   | 0.57          | 0.018         | 0.55          | 3.1                                        | 5.7                                     | 9.9                          | 3.1                                         | 3.1                                          | 4.4                                          | 0.9                                          |
| 20   | 0.51          | 0.019         | 0.49          | 3.4                                        | 6.3                                     | 8.0                          | 3.4                                         | 3.4                                          | 6.3                                          | 2.7                                          |
| 50   | 0.44          | 0.017         | 0.42          | 3.9                                        | 6.4                                     | 6.2                          | 3.8                                         | 4.1                                          | 9.2                                          | 5.7                                          |
| 100  | 0.29          | 0.013         | 0.28          | 4.1                                        | 5.8                                     | 4.6                          | 4.0                                         | 4.8                                          | 16.0                                         | 12.2                                         |

<sup>a, b, c</sup> Fluorescence quantum yield and yields of PF and DF, respectively.

<sup>d</sup> Fluorescence decay rate.

<sup>e</sup> Radiative decay rate.

<sup>f</sup> TADF decay time.

<sup>g, h, i, j</sup> ISC, rISC, nonradiative triplet decay and triplet concentration quenching rates, respectively.

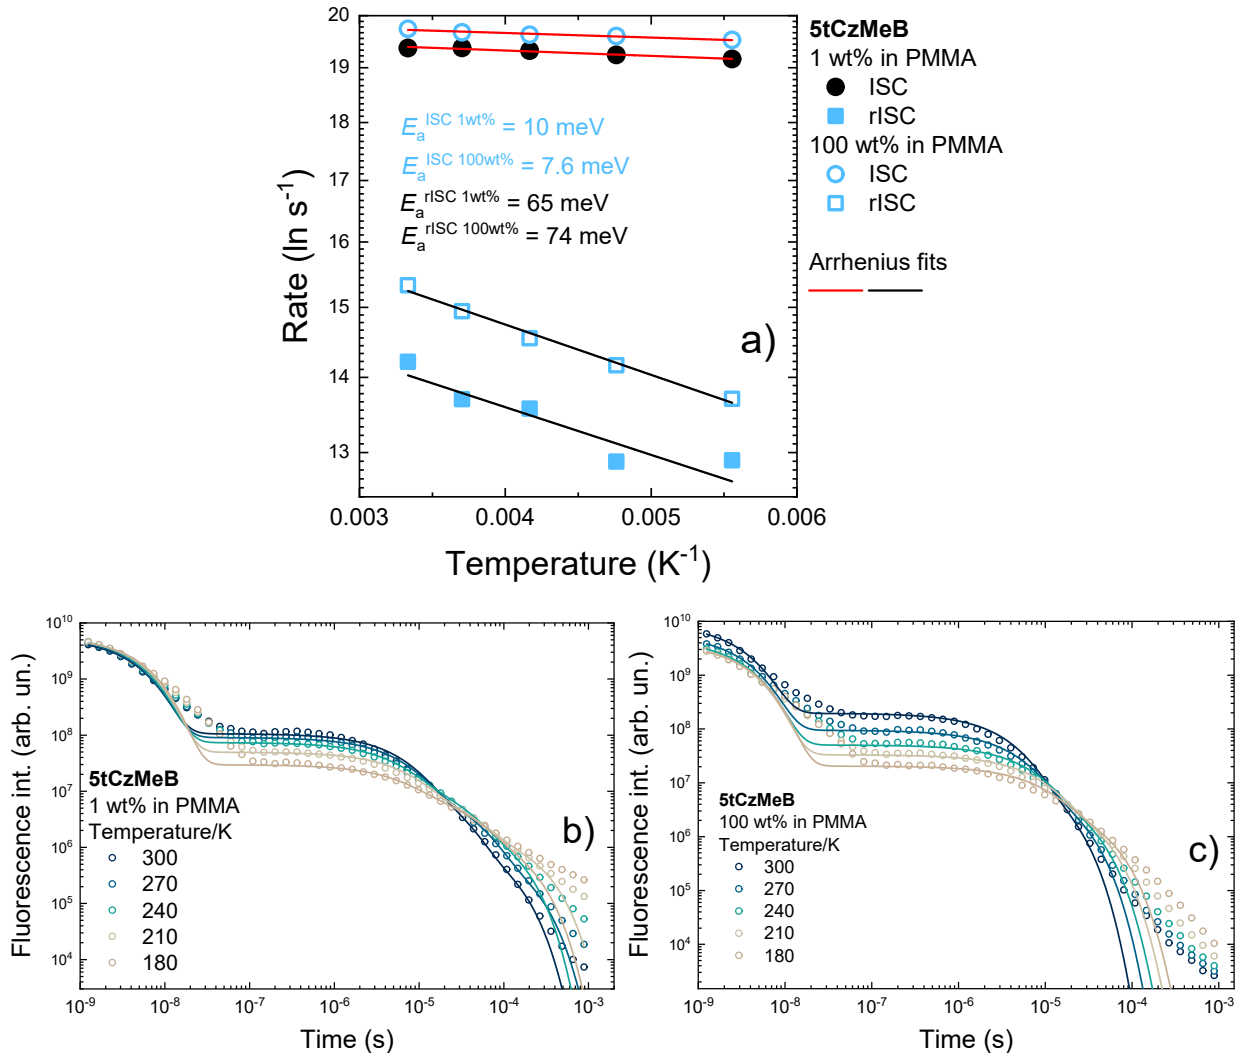

**Fig. S5** Arrhenius plots for ISC and rISC rates for **5tCzMeB** doped at 1wt% and 100wt% in PMMA (a). Fluorescence decay transients of 1wt% and 100wt% PMMA films of **5tCzMeB** at 300-180K temperature (b, c, respectively).

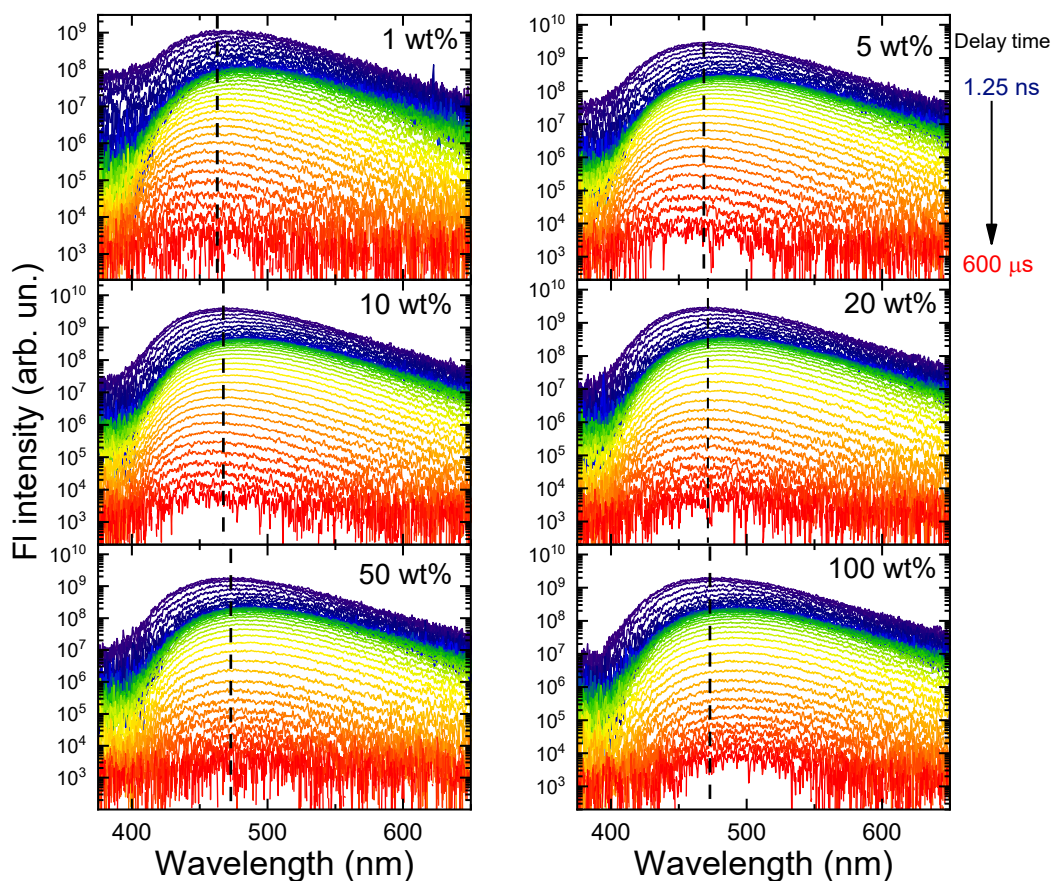

**Fig. S6** TRPL spectra of **5tCzMeB** in PMMA at different doping loads in oxygen-free surrounding at room temperature. Lines are guides for eyes.

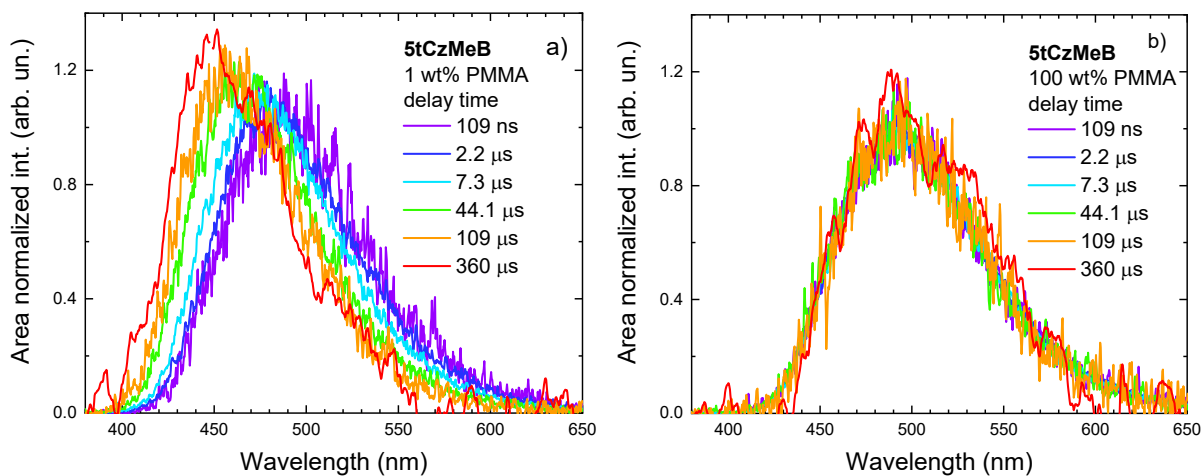

**Fig. S7** Area-normalized time-resolved fluorescence spectra of 1 wt% (a) and 100 wt% (b) PMMA films of **5tCzMeB** at room temperature.

## References

- 1 T. Hosokai, H. Matsuzaki, H. Nakanotani, K. Tokumaru, T. Tsutsui, A. Furube, K. Nasu, H. Nomura, M. Yahiro and C. Adachi, *Sci. Adv.*, 2017, **3**, e1603282.
- 2 G. Kreiza, D. Banevičius, J. Jovaišaitė, K. Maleckaitė, D. Gudeika, D. Volyniuk, J. V. Gražulevičius, S. Juršėnas and K. Kazlauskas, *J. Mater. Chem. C*, 2019, **7**, 11522–11531.
